# Supplementary material
Source: PubMed Central journal article supplement (PMC3378133)
Supplement: emmm0001-0223-SD1.pdf [file emmm0001-0223-SD1.pdf]

## SUPPLEMENTARY INFORMATION

### The 28-amino acid form of an APLP1-derived A $\beta$ -like peptide is a surrogate marker for A $\beta$ 42 production in the central nervous system

Kanta Yanagida,<sup>1#</sup> Masayasu Okochi,<sup>1#¶</sup> Shinji Tagami,<sup>1</sup> Taisuke Nakayama,<sup>1</sup> Takashi S. Kodama,<sup>1</sup> Kouhei Nishitomi,<sup>1</sup> Jingwei Jiang,<sup>1</sup> Kohji Mori,<sup>1</sup> Shin-ichi Tatsumi,<sup>1</sup> Tetsuaki Arai,<sup>2</sup> Takeshi Ikeuchi,<sup>3</sup> Kensaku Kasuga,<sup>3</sup> Takahiko Tokuda,<sup>4</sup> Masaki Kondo,<sup>4</sup> Masaki Ikeda,<sup>5</sup> Kentaro Deguchi,<sup>6</sup> Hiroaki Kazui,<sup>1</sup> Toshihisa Tanaka,<sup>1</sup> Takashi Morihara,<sup>1</sup> Ryota Hashimoto,<sup>1</sup> Takashi Kudo,<sup>1</sup> Harald Steiner,<sup>7</sup> Christian Haass,<sup>7</sup> Kuniaki Tsuchiya,<sup>2</sup> Haruhiko Akiyama,<sup>2</sup> Ryozi Kuwano,<sup>8</sup> Masatoshi Takeda<sup>1</sup>

*Running title: Novel APLP1-derived A $\beta$ -like peptides in human CSF*

#### Supplementary table 1. List of APLP1 peptides detected in human CSF

| APLP1 derivative | M <sub>r</sub> (observed) | M <sub>r</sub> (calculated) | Amino acid sequence          |
|------------------|---------------------------|-----------------------------|------------------------------|
| APL1 $\beta$ 25  | 2329                      | 2327.2                      | DELAPAGTGVSREAVSGLLIMGAGG    |
| APL1 $\beta$ 27  | 2473                      | 2471.3                      | DELAPAGTGVSREAVSGLLIMGAGGGS  |
| APL1 $\beta$ 28  | 2586                      | 2584.3                      | DELAPAGTGVSREAVSGLLIMGAGGGSL |

All amino acid sequences were confirmed by LC/MS/MS analysis (See Supplementary figure 1).

#### Supplementary table 2. Clinical information for the sporadic AD, non-AD, and non-demented patients in the study

| No.  | sex | diagnosis                                         | Age             |
|------|-----|---------------------------------------------------|-----------------|
| A1   | M   | syphilis, cancer (pancreas)                       | clinically n.r. |
| A2   | M   | familial ataxia, schizophrenia                    | clinically n.r. |
| A3   | F   | secondary parkinsonism, dementia (atypical)       | clinically n.r. |
| A6   | M   | dementia (atypical), subdural hematoma            | clinically n.r. |
| A7   | F   | viral encephalomyelitis by cytomegalovirus        | clinically n.r. |
| A8   | F   | chronic alcoholism, dementia                      | clinically n.r. |
| A12  | F   | encepharomyelitis                                 | clinically n.r. |
| A14  | M   | bacterial meningoenzephalitis, schizophrenia      | clinically n.r. |
| A16  | M   | acute subdural hematoma, NPH                      | clinically n.r. |
| A17  | M   | local brain injury                                | clinically n.r. |
| A18  | M   | sequela of intracerebral hemorrhage               | clinically n.r. |
| A19  | M   | NPH, chronic renal insufficiency                  | clinically n.r. |
| A21  | F   | amnesia                                           | clinically n.r. |
| A22  | M   | communicating hydrocephalus, cerebral aneurysm    | clinically n.r. |
| A23  | F   | NPH, chronic renal insufficiency                  | clinically n.r. |
| A25  | M   | cerebral thrombosis                               | clinically n.r. |
| A28  | M   | polyneuropathy, sepsis, schizophrenia             | clinically n.r. |
| A29  | M   | syphilis, cirrhosis                               | clinically n.r. |
| A32  | M   | encepharomyelitis                                 | clinically n.r. |
| A33  | M   | Behcet's disease                                  | clinically n.r. |
| A34  | M   | schizophrenia                                     | clinically n.r. |
| A35  | M   | trauma (body injury)                              | clinically n.r. |
| A37  | F   | sporadic AD                                       | clinically n.r. |
| A38  | M   | syphilis, dementia                                | clinically n.r. |
| C60  | M   | sporadic AD, MMSE 22/30 (74y), MMSE 10/30 (77y)   | clinically 75   |
| C63  | M   | sporadic AD                                       | clinically 58   |
| C67  | M   | dementia (atypical, unspecified), MMSE 0/30 (51y) | clinically 51   |
| C71  | F   | dementia (atypical)                               | clinically 46   |
| C75  | M   | progressive aphasia, MMSE29/30 (70y)              | clinically 76   |
| C76  | M   | sporadic AD, MMSE 7/30 (68y)                      | clinically 68   |
| C77  | F   | Pick disease, psychosis (54y)                     | clinically 55   |
| C78  | F   | sporadic AD, MMSE20/30 (74y), MMSE16 (79y)        | clinically 74   |
| C84  | M   | FTLD, MMSE 8/30 (60y)                             | clinically 60   |
| C85  | F   | sporadic AD, MMSE 7/30 (51y)                      | clinically 52   |
| C98  | F   | sporadic AD, MMSE 25 (68y)                        | clinically 68   |
| C99  | F   | non-demented, MMSE 28/30 (78y)                    | clinically 79   |
| C100 | M   | dementia (atypical), MMSE 14/30 (74y), ADAS 26.7  | clinically 73   |
| C101 | M   | sporadic AD, MMSE 11/30 (72y)                     | clinically 72   |
| C103 | F   | sporadic AD, MMSE 22/30 (76y)                     | clinically 76   |
| C106 | F   | NPH, MMSE 23/30 (79y)                             | clinically 79   |
| C108 | M   | NPH, MMSE 12/30 (81y)                             | clinically 82   |
| C111 | M   | NPH, MMSE 23/30 (70y), ADAS9.6/70 (71y)           | clinically 70   |
| C112 | F   | sporadic AD, MMSE 19/30 (79y)                     | clinically 79   |
| C113 | M   | familial dementia (atypical), MMSE 1/30 (78y)     | clinically 79   |
| C114 | F   | sporadic AD, MMSE 18/30 (80y)                     | clinically 80   |
| D001 | F   | sporadic AD, Age at onset 76y                     | clinically 84   |
| D002 | F   | sporadic AD, Age at onset 63y                     | clinically 83   |
| D003 | F   | sporadic AD, Age at onset 76y                     | clinically 86   |
| D046 | F   | sporadic AD, Age at onset 49y, ApoE 3/3           | clinically 54   |
| D065 | F   | sporadic AD                                       | clinically 55   |
| D092 | M   | sporadic AD, Age at onset 60y                     | clinically 70   |
| D143 | F   | sporadic AD, Age at onset 64y                     | clinically 66   |
| D174 | M   | sporadic AD, Age at onset 69y, ApoE 4/4           | clinically 78   |
| D175 | F   | sporadic AD, Age at onset 71y                     | clinically 83   |
| D241 | F   | sporadic AD                                       | clinically 68   |
| D383 | F   | sporadic AD, Age at onset 78y                     | clinically 78   |
| D415 | M   | sporadic AD, Age at onset 59y, ApoE 3/4           | clinically 63   |
| D444 | F   | sporadic AD                                       | clinically 73   |
| D452 | F   | sporadic AD, Age at onset 51y, ApoE 3/3           | clinically 54   |
| D538 | M   | sporadic AD, Age at onset 74y, ApoE 4/4           | clinically 82   |
| D595 | F   | sporadic AD                                       | clinically 65   |
| D682 | M   | sporadic AD, Age at onset 60y, ApoE 3/3           | clinically 69   |
| D731 | M   | sporadic AD, Age at onset 74y                     | clinically 76   |
| D734 | F   | sporadic AD, Age at onset 72y, ApoE 3/4           | clinically 74   |
| D887 | F   | sporadic AD                                       | clinically n.r. |
| D909 | F   | sporadic AD, Age at onset 52y                     | clinically 56   |
| D930 | F   | sporadic AD, Age at onset 76y                     | clinically 80   |
| D937 | F   | sporadic AD, Age at onset 55y, ApoE 3/3           | clinically 71   |
| E001 | M   | MCI, MMSE 28/30, converted to sporadic AD         | clinically 70   |
| E002 | M   | MCI, MMSE 28/30, converted to sporadic AD         | clinically 61   |
| E003 | M   | MCI, MMSE 25/30, converted to sporadic AD         | clinically 74   |
| E004 | F   | MCI, MMSE 27/30, converted to sporadic AD         | clinically 72   |
| E006 | F   | MCI, MMSE 27/30, converted to sporadic AD         | clinically 78   |
| E007 | M   | MCI, MMSE 27/30, converted to sporadic AD         | clinically 77   |
| E008 | M   | MCI, MMSE 24/30, converted to sporadic AD         | clinically 76   |
| E009 | M   | MCI, MMSE 24/30, converted to sporadic AD         | clinically 72   |
| E010 | F   | MCI, MMSE 26/30, converted to sporadic AD         | clinically 78   |
| E103 | F   | sporadic AD                                       | clinically 68   |
| E104 | M   | sporadic AD                                       | clinically 72   |
| E105 | F   | sporadic AD, MMSE 18/30                           | clinically 74   |
| E106 | M   | sporadic AD, MMSE 18/30                           | clinically 79   |

n.r., not recorded.

## Supplementary figure 1

Determination of the amino acid sequences of the APLP1 peptides in human CSF by

### LC/MS/MS analysis.

**Left panels; MS/MS spectra of APL1 $\beta$ 25 (A), APL1 $\beta$ 27 (B), and APL1 $\beta$ 28 (C) in human CSF.** LC/MS/MS analysis was performed for CSF peptides with molecular weights (A, 2327 Da [m/z 1164.6]; B, 2471 Da [m/z 1236.6]; C, 2584 Da [m/z 1293.2]) and elution times (A, ~21.1 min; B, ~20.6 min; C, ~21.8 min) identical to those of synthetic APL1 $\beta$  species. Enhanced product-ion analysis was performed at the time of elution, and MS/MS spectra were obtained.

**Upper right panels; MS/MS spectra of APL1 $\beta$  species with peaks labeled by the Mascot MS/MS Ion Search database.** MS/MS data were submitted to the Mascot MS/MS Ion Search database (A, B, and C; left panels), which determines the amino acid sequences of the parent ions by comparing them with all the protein sequences registered in the SWISS-PROT data base. The database returns the MS/MS spectra with labeled peaks in which calculated and measured molecular weights are identical (A, B and C; upper right panels).

**Lower right panels; The probability-based mowse scores of APL1 $\beta$  species in CSF.** The probability-based mowse scores (\*P=109 [A], 112 [B], and 53 [C]) indicated that the only possible parent ions that could be generated from human APLP1 for the 2327, 2741, and 2585 Da peptides were the amino acid sequences DELAPAGTGVSREAVSGLLIMGAGG, DELAPAGTGVSREAVSGLLIMGAGGGS, and DELAPAGTGVSREAVSGLLIMGAGGGSL, respectively. Note that the probability score is  $-10 \cdot \log(P)$ , where  $P$  is the probability that the observed match is a random event.

### Supplementary figure 2

**Juxtamembrane sequence of APLP1 and  $\beta$ APP are cleaved by recombinant BACE1 and 2 *in vitro*.**

Based on the *in vitro* BACE cleavage assay of  $\beta$ APP (Koike et al., 1999), we established an *in vitro* BACE cleavage assay for the APLP1 juxtamembrane domain. The APLP1 juxtamembrane domain (Nma-EIQRDELAK(Dnp)-RR-NH<sub>2</sub>) was mixed with recombinant ectodomain of BACE1/2. Following incubation for 3 h at 30°C, the fluorescence was measured at an excitation wavelength of 320 nm and an emission wavelength of 405 nm. The recombinant BACE1/2 resulted in an increase in the fluorescence. The increase could be inhibited by addition of inhibitor IV (10  $\mu$ M). These results show that APLP1 as well as the  $\beta$ APP peptide (Farzan et al., 2000; Hussain et al., 2000) were cleaved by BACE1/2. Note that activities of the recombinant BACE1 and BACE2 enzymes were normalized by their proteolytic activities for the  $\beta$ APP peptide. The experiments were performed three times and values represent means  $\pm$  SD.

### Supplementary figure 3

**Selection of optimal daughter ions and conditions for quantification by LC/MS/MS analysis.**

Parental ions for APL1 $\beta$ 25 (A), APL1 $\beta$ 27 (B), and APL1 $\beta$ 28 (C) were degraded into

several daughter ions by MS/MS (collision energy, 50–80 eV). The daughter ions for which the peak heights were relatively high were selected for quantification. For APL1 $\beta$ 25/28, the b<sub>2</sub>, y<sub>20</sub>, and y<sub>21</sub> ions were used, whereas for APL1 $\beta$ 27, the b<sub>2</sub>, y<sub>21</sub>, and y<sub>22</sub> ions were used.

#### **Supplementary figure 4**

##### **FA fractions from AD brain tissues contain almost no APL1 $\beta$ .**

(A) FA fractions from sporadic AD brain tissues (65 mg) contained very high amounts of A $\beta$  but almost no detectable APL1 $\beta$ . (B, C) Additional presentations of the data of Figure 4A and B. Note that FA fractions extracted from the same amount of sporadic AD (AD1 and AD2) or non-AD (N1 and N2) brain samples (65 mg) were used in the experiment shown in (A) and (C).

#### **Supplementary figure 5**

##### **Immunohistochemical detection of senile plaques in serial AD sections.**

Both with (E,F, and G) and without (B, C, and D) FA treatment (brain sections were dipped in 100% FA solution for 10 s), paraffin sections of brain tissues were stained with the anti-APL1 $\beta$  antibodies OA601 (C and F) and OA663 (D and G). Senile plaques were not detected with the antibodies, although under the experimental conditions, a considerable number of senile plaques were detected using anti-A $\beta$  antibody 4G8 even in the absence of FA treatment (B). Panels A and H show methenamine silver staining.

#### **Supplementary figure 6**

##### **APL1 $\beta$ forms almost no protofibril *in vitro*.**

To further characterize the non-aggregative nature of APL1 $\beta$ , we incubated the APL1 $\beta$  species (B, C, and D) *in vitro* under conditions where A $\beta$ 40 (A) forms amyloid fibrils (Hartley et al., 1999). To observe potential protofibril formation by APL1 $\beta$ , we increased the incubation period 12-fold compared to that necessary for the formation of A $\beta$ 40 protofibrils. Following the incubation, we examined amyloid protofibril formation by size exclusion chromatography. We could not detect any APL1 $\beta$ -derived protofibrils (B, C, and D), although we confirmed that A $\beta$  (A) forms protofibrils under these conditions.

#### **Supplementary figure 7**

##### **Sulindac sulfide and compound-W, which lower the relative A $\beta$ 42 level, do not decrease the relative APL1 $\beta$ 28 level.**

(A) In addition to S2474, fenofibrate, another PS/ $\gamma$ -secretase modifier, also induces an increase in the relative secretion of APL1 $\beta$ 28 to total APL1 $\beta$  in naive SH-SY5Y cells. Blue, red, and yellow bars indicate the ratios of APL1 $\beta$ 25, APL1 $\beta$ 27, and APL1 $\beta$ 28 to total APL1 $\beta$ ,

respectively. In the conditioned media, the ratio of A $\beta$ 42 to total A $\beta$  was elevated (data not shown). However, sulindac sulfide and Compound-W (CW) decreased the relative generation of A $\beta$ 42 to total A $\beta$  in naive SH-SY5Y cells (B), but they did not decrease the relative generation of APL1 $\beta$ 28 to total APL1 $\beta$  (C). (D) The relationship between the relative levels of APL1 $\beta$ 28 to A $\beta$ 42 in the presence of the indicated  $\gamma$ -secretase modulators.

### **Supplementary figure 8**

#### **Displacement of endogenous PS proteins in PS/ $\gamma$ -secretase complex by the exogenous mutant form in stable cell lines.**

We prepared K293 cell lines stably expressing both  $\beta$ APP sw and wt APLP1. From these cell lines, we chose stable clones that expressed exogenous PS1 mutants at levels high enough so that endogenous PS1/2 in the PS/ $\gamma$ -secretase complex was displaced by the exogenous PS1 mutants. To do this, we first chose stable cell lines that overexpress PS1 holoprotein, which is degraded via the ubiquitin-proteasome pathway immediately after translation (Steiner et al., 1998), such that the positive signal is barely detectable in untransfected cells. Subsequently, from these cell lines, we further selected clones in which endogenous PS2 is considerably displaced by the exogenous PS1 mutant proteins. The PS1 holoprotein band (~45 kDa) was clearly observed, whereas the PS2 CTF band (~18 kDa) was barely detectable. Relative levels of APL1 $\beta$  and A $\beta$  species in conditioned media from these PS1 mutant-expressing cells were determined and are shown in Figure 5D.

### **Supplementary figure 9**

#### **Each APL1 $\beta$ species in CSF is degraded in a similar rate.**

We investigated whether there is a difference in the rate of degradation for the various APL1 $\beta$  species in CSF between sporadic AD patients (B) and non-demented controls (A). The experiments were performed three times, and representative data are shown. We incubated each APL1 $\beta$  species (2.5 nmol) in the CSF (100  $\mu$ l) for the indicated time. After boiling for 5 min in SDS-sample buffer, the samples were separated in Tris-Tricine gels and then analyzed by Western blotting with the OA601 antibody. Note that the rate of degradation of each APL1 $\beta$  species did not differ.

## **REFERENCES FOR SUPPLEMENTARY INFORMATION**

Farzan, M., Schnitzler, C.E., Vasilieva, N., Leung, D. and Choe, H. (2000) BACE2, a beta -secretase homolog, cleaves at the beta site and within the amyloid-beta region of the amyloid-beta

- precursor protein. *Proc Natl Acad Sci U S A*, **97**, 9712-9717.
- Hartley, D.M., Walsh, D.M., Ye, C.P., Diehl, T., Vasquez, S., Vassilev, P.M., Teplow, D.B. and Selkoe, D.J. (1999) Protofibrillar intermediates of amyloid beta-protein induce acute electrophysiological changes and progressive neurotoxicity in cortical neurons. *J Neurosci*, **19**, 8876-8884.
- Hussain, I., Powell, D.J., Howlett, D.R., Chapman, G.A., Gilmour, L., Murdock, P.R., Tew, D.G., Meek, T.D., Chapman, C., Schneider, K., Ratcliffe, S.J., Tattersall, D., Testa, T.T., Southan, C., Ryan, D.M., Simmons, D.L., Walsh, F.S., Dingwall, C. and Christie, G. (2000) ASP1 (BACE2) cleaves the amyloid precursor protein at the beta-secretase site. *Mol Cell Neurosci*, **16**, 609-619.
- Koike, H., Seki, H., Kouchi, Z., Ito, M., Kinouchi, T., Tomioka, S., Sorimachi, H., Saido, T.C., Maruyama, K., Suzuki, K. and Ishiura, S. (1999) Thimet oligopeptidase cleaves the full-length Alzheimer amyloid precursor protein at a beta-secretase cleavage site in COS cells. *J Biochem (Tokyo)*, **126**, 235-242.
- Steiner, H., Capell, A., Pesold, B., Citron, M., Kloetzel, P.M., Selkoe, D.J., Romig, H., Mendla, K. and Haass, C. (1998) Expression of Alzheimer's disease-associated presenilin-1 is controlled by proteolytic degradation and complex formation. *J Biol Chem*, **273**, 32322-32331.
